# Supplementary material
Source: publisher figshare collection journal article supplement (https://asha.figshare.com/articles/dataset/_/12469187)
Supplement: Supplementary file 1 [file 1]

## Supplemental Material S3

| <i>Coded Conversational Excerpt with Comments</i>                                                                                                                                                                                                                                                                     |                                                                                            |                 |                                                                                                                                                                                 |                         |
|-----------------------------------------------------------------------------------------------------------------------------------------------------------------------------------------------------------------------------------------------------------------------------------------------------------------------|--------------------------------------------------------------------------------------------|-----------------|---------------------------------------------------------------------------------------------------------------------------------------------------------------------------------|-------------------------|
| Context: SLP-P and P8 are in P8's living room. This segment is the very start of their conversation upon first meeting one another.                                                                                                                                                                                   |                                                                                            |                 |                                                                                                                                                                                 |                         |
| Speaker                                                                                                                                                                                                                                                                                                               | Utterance                                                                                  | 4-point GCSconv | Comment                                                                                                                                                                         | Category for Reduced GC |
| SLP-P                                                                                                                                                                                                                                                                                                                 | Is it your family, all the all the pictures {looking at pictures on wall}.                 |                 |                                                                                                                                                                                 |                         |
| P8                                                                                                                                                                                                                                                                                                                    | Yes {nods}.                                                                                |                 |                                                                                                                                                                                 |                         |
| P8                                                                                                                                                                                                                                                                                                                    | <b>They're they don't come a lot {puts hand up as if to say stop}.</b>                     |                 | Topic: Family living arrangement                                                                                                                                                |                         |
| SLP-P                                                                                                                                                                                                                                                                                                                 | Uhhuh.                                                                                     |                 |                                                                                                                                                                                 |                         |
| P8                                                                                                                                                                                                                                                                                                                    | Cuz one of them lives nearby {brings arm and hand close to self}.                          | 4               | "them" is an environmental reference to the family members in the photos                                                                                                        |                         |
| P8                                                                                                                                                                                                                                                                                                                    | And she lives with her daughter {moves hand away}.                                         | 3               | "she" is not clearly referenced                                                                                                                                                 |                         |
| SLP-P                                                                                                                                                                                                                                                                                                                 | Ok.                                                                                        |                 |                                                                                                                                                                                 |                         |
| P8                                                                                                                                                                                                                                                                                                                    | And her daughter and her boyfriend {gesturing a location} live in the apartment with them. | 3               | GC reduced: lack of adequate reference for the second "her", making it unclear whose boyfriend lives in the apartment                                                           |                         |
| SLP-P                                                                                                                                                                                                                                                                                                                 | Uhhuh.                                                                                     |                 |                                                                                                                                                                                 |                         |
| P8                                                                                                                                                                                                                                                                                                                    | And they live in a house {gesturing a tall building}.                                      | 4               | "they" refers to the three people she's mentioned; although listener doesn't know exactly who these three are, lack of reference is not continually penalized in this situation |                         |
| P8                                                                                                                                                                                                                                                                                                                    | And she owns the rest of the house {still moving arm up and down to signify the house}.    | 4               | "She" refers to the first person mentioned                                                                                                                                      |                         |
| SLP-P                                                                                                                                                                                                                                                                                                                 | OK.                                                                                        |                 |                                                                                                                                                                                 |                         |
| P8                                                                                                                                                                                                                                                                                                                    | So they have {revised utterance}.                                                          |                 |                                                                                                                                                                                 |                         |
| P8                                                                                                                                                                                                                                                                                                                    | They talk to each other a little bit {waves hand around as if between two people talking}. | 2               | Tangential                                                                                                                                                                      | Off-topic               |
| P8                                                                                                                                                                                                                                                                                                                    | <b>And the daughter's very good</b>                                                        |                 | Topic: Daughter's work                                                                                                                                                          |                         |
| P8                                                                                                                                                                                                                                                                                                                    | She has {revised utterance}                                                                |                 |                                                                                                                                                                                 |                         |
| P8                                                                                                                                                                                                                                                                                                                    | She works in um {abandoned utterance}.                                                     |                 |                                                                                                                                                                                 |                         |
| P8                                                                                                                                                                                                                                                                                                                    | I can't say the name of it                                                                 |                 |                                                                                                                                                                                 |                         |
| SLP-P                                                                                                                                                                                                                                                                                                                 | That's ok                                                                                  |                 |                                                                                                                                                                                 |                         |
| Conversation continues about these individuals. 65 utterances later the SLP-P wants to know who is being talked about, asking "and so that person is/what's the relationship"? P8 answers, sounding surprised, "my daughter". This question indicates SLP-P's difficulty establishing GC based on P8's communication. |                                                                                            |                 |                                                                                                                                                                                 |                         |
| Note. 4-point GCSconv = 4-point Global Coherence Scale in Unstructured Conversation; GC = global coherence; <b>Bold</b> = new topic; new topics are not coded for global coherence.                                                                                                                                   |                                                                                            |                 |                                                                                                                                                                                 |                         |
