# Supplementary material
Source: publisher figshare collection journal article supplement (https://asha.figshare.com/articles/dataset/_/12469187)
Supplement: Supplementary file 2 [file 1]

## Supplemental Material S1

### *4-Point GCsconv Interrater Reliability Data for Varied Sampling Methodologies*

| Raters | SAMPLE SIZE: 18 Conversations       |                             |                               |                 |                                                |                             |                               |                 | SAMPLE SIZE: 6 Conversations |                             |                               |                 |
|--------|-------------------------------------|-----------------------------|-------------------------------|-----------------|------------------------------------------------|-----------------------------|-------------------------------|-----------------|------------------------------|-----------------------------|-------------------------------|-----------------|
|        | 34% Utterances by Time <sup>1</sup> |                             |                               |                 | 34% Utterances by # of Utterances <sup>2</sup> |                             |                               |                 | 100% of 6 Conversations      |                             |                               |                 |
|        | Total Utt.                          | # Utt. Analyzed (% of data) | Coefficient (C.I.)            | <i>p</i> -value | Total Utt.                                     | # Utt. Analyzed (% of data) | Coefficient (C.I.)            | <i>p</i> -value | Total Utt.                   | # Utt. Analyzed (% of data) | Coefficient (C.I.)            | <i>p</i> -value |
| FA/RA1 | 601                                 | 206 (34.3%)                 | .983 <sup>3</sup> [.921-.997] | .000            | 601                                            | 225 (37.4%)                 | .879 <sup>4</sup> [n. a.]     | .001            | n. a.                        | n. a.                       | n. a.                         | n. a.           |
| FA/RA2 | 508                                 | 177 (34.8%)                 | .932 <sup>3</sup> [.711-.986] | .000            | 508                                            | 186 (36.6%)                 | .972 <sup>3</sup> [.886-.994] | .000            | n. a.                        | n. a.                       | n. a.                         | n. a.           |
| FA/RA  | n. a.                               | n. a.                       | n. a.                         | n. a.           | n. a.                                          | n. a.                       | n. a.                         | n. a.           | 378                          | 378 (100%)                  | .912 <sup>3</sup> [.486-.987] | .003            |

*Note.* 4-point GCsconv = 4-point Global Coherence Scale; <sup>1</sup> reported in manuscript; # = number; <sup>2</sup> to ensure 34% of each transcript was subjected to interrater reliability, RA1 needed to code an additional 19 utterances; RA2 needed to code an extra 9 utterances; utt. = utterances; C.I. = 95% confidence interval FA = first author; RA1 = research assistant 1; <sup>3</sup> intraclass correlation procedure used for parametric data, model description: 2-way random effects with absolute agreement and single rater measures; <sup>4</sup> Spearman's rho correlation procedure for non-parametric data; n. a. = not applicable; RA2 = research assistant 2; RA = research assistants data combined due to small sample size.
