# Supplementary material
Source: publisher figshare collection journal article supplement (https://asha.figshare.com/articles/dataset/_/12469187)
Supplement: Supplementary file 3 [file 1]

## Supplemental Material S2

| <i>Individual 4-point GCScnv Scores</i> |        |       |
|-----------------------------------------|--------|-------|
| GCScnv Score                            |        |       |
| Participant                             | Home-P | SLP-P |
| P1                                      | 3.67   | 3.48  |
| P2                                      | 3.90   | 3.80  |
| P3                                      | 3.04   | 2.75  |
| P4                                      | 3.84   | 3.77  |
| P5                                      | 3.15   | 2.74  |
| P6                                      | 3.80   | 3.40  |
| P7                                      | 3.85   | 3.89  |
| P8                                      | 3.90   | 3.75  |
| P9                                      | 3.21   | 2.71  |

*Note.* 4-point GCScnv = 4-point Global Coherence Scale in Unstructured Conversation.
